# Supplementary material for: Evaluation of Stages, Treatment Protocols, and Outcomes of Colorectal Cancer among West Bank Patients
Source: MDPI journal article supplement (doi:10.3390/jcm13082284), 2024-04-15
Supplement: s1 [file s1]

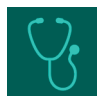

**Supplementary Table S1. Data Collection Form**

|                                  |                     |                                 |                   |                                            |       |
|----------------------------------|---------------------|---------------------------------|-------------------|--------------------------------------------|-------|
| <b>MEDICAL RECORD</b><br># _____ |                     | <b>GENDER</b><br>Male<br>Female |                   | <b>DATE OF BIRTH</b><br>_____<br>Age _____ |       |
| <b>BLOOD GRP</b><br>_____        |                     | <b>HEIGHT</b> _____             |                   | <b>WEIGHT</b> _____                        |       |
| <b>BMI</b><br>_____              |                     |                                 |                   |                                            |       |
| <b>MARITAL STATUS</b>            | Single              | Married                         | Divorced          | Widowed                                    |       |
| <b>EDUCATION</b>                 | No formal Edu.      | Primary                         | Secondary         | Tertiary                                   |       |
| <b>SMOKING</b>                   | Smoker              | Non-Smoker                      | Ex-smoker         |                                            |       |
| <b>ALCOHOL</b>                   | Drinker             | Ex-drinker                      | Non-drinker       |                                            |       |
| <b>NUTRITION</b>                 | Well Nourished      | Malnourished                    | Vegetarian        |                                            |       |
| <b>Allergy</b>                   | None                |                                 | Allergic to _____ |                                            |       |
| <b>DISEASE HISTORY</b>           | Diabetes            | Dyslipidemia                    | Hypertension      | IHD                                        | _____ |
|                                  | Stroke              | Heart Failure                   | Arrhythmia        | IBD                                        | _____ |
|                                  | Asthma              | IBS                             | L. Cirrhosis      | R. Arthritis                               | _____ |
|                                  | COPD                | CKD                             | Gout              | Osteoporosis                               | _____ |
| <b>FAMILY HISTORY</b>            | Cancer (Type _____) |                                 |                   | NONE                                       |       |

**B: COLORECTAL CANCER CHARACTERISTICS**

|                                   |          |                              |
|-----------------------------------|----------|------------------------------|
| <b>Colon cancer</b>               | Yes      | No                           |
| <b>Rectum cancer</b>              | Yes      | No                           |
| <b>Stage (TNM)</b>                |          |                              |
| <b>Diagnosis date</b>             |          |                              |
| <b>Last visit date</b>            |          |                              |
| <b>Treatment method</b>           | Surgical | Radiotherapy<br>Chemotherapy |
| <b>Medical treatment protocol</b> | FOLFOX   | FOLFIRI Other _____          |
| <b>Number of cycles completed</b> |          |                              |

**C: LAB RESULTS (last readings)**

| Renal function test |  |  |  |                             | CBC |  |  |  |                  | Other   |  |  |  |  |
|---------------------|--|--|--|-----------------------------|-----|--|--|--|------------------|---------|--|--|--|--|
| Na                  |  |  |  | 135-145 mmol/L              | RBC |  |  |  | 4-11 x103/mm3    | R.B Glu |  |  |  |  |
| K                   |  |  |  | 3 -5 mmol/L                 | WBC |  |  |  | 4-6.2 x103/mm3   | HbA 1c  |  |  |  |  |
| Ur ea               |  |  |  | 1.7 – 8.3 mmol/L            | HGB |  |  |  | 11-18 g/dL       | INR     |  |  |  |  |
| Cr                  |  |  |  | 53-97 µmol/L<br>44-80µmol/L | HCT |  |  |  | 35-55%           | CRP     |  |  |  |  |
| Cr Cl               |  |  |  |                             | MCV |  |  |  | 80-100           |         |  |  |  |  |
| Uri c acid          |  |  |  | 210-420 µmol/L              | PLT |  |  |  | 150-400 x103/mm3 |         |  |  |  |  |
| Mg                  |  |  |  | 0.7-1.05                    |     |  |  |  |                  |         |  |  |  |  |
| Ca                  |  |  |  | 2.3-2.5mmol /L              |     |  |  |  |                  |         |  |  |  |  |
| Ph osp              |  |  |  | 0.9-1.3 mmol/L              |     |  |  |  |                  |         |  |  |  |  |

#### D: Home MEDICATIONS

| Drug | Frequency |  |
|------|-----------|--|
|      |           |  |
|      |           |  |
|      |           |  |
|      |           |  |
|      |           |  |
|      |           |  |
|      |           |  |

Outcomes of treatment: cure      death      recurrence      not known  
 Years of survival after diagnosis: \_\_\_\_\_
